# Supplementary material for: Ankle–Brachial Index Predicts Long-Term Renal Outcomes in Acute Stroke Patients
Source: MDPI journal article supplement (doi:10.3390/healthcare10050913), 2022-05-13
Supplement: s1 [file s1]

**Table S1.** Predictors of a 30% decline in eGFR during follow-up by the Cox proportional hazards model.

| Variables                       | Crude HR<br>(95% CI) | P Value | Adjusted CRR<br>(95% CI) | P Value |
|---------------------------------|----------------------|---------|--------------------------|---------|
| Age                             | 1.04 (1.02-1.06)     | <0.001  | 1.03 (1.00-1.05)         | 0.026*  |
| Male                            | 0.77 (0.50-1.18)     | 0.233   |                          |         |
| BMI                             | 0.99 (0.93-1.04)     | 0.601   |                          |         |
| Borderline ABI<br>(0.91~0.99)   | 1.33 (0.72-2.46)     | 0.359   | 1.16 (0.61-2.21)         | 0.641   |
| Abnormal ABI ( $\leq 0.90$ )    | 2.24 (1.35-3.71)     | 0.002   | 1.54 (0.91-2.60)         | 0.105   |
| baPWV $\geq 1.4$                | 0.99 (0.40-2.46)     | 0.984   |                          |         |
| Hyperlipidemia                  | 0.89 (0.60-1.31)     | 0.547   |                          |         |
| Heart disease                   | 0.95 (0.47-1.92)     | 0.887   |                          |         |
| Smoking                         | 0.84 (0.37-1.94)     | 0.690   |                          |         |
| Hypertension                    | 1.47 (0.91-2.39)     | 0.115   |                          |         |
| Diabetes Mellitus               | 1.66 (1.08-2.55)     | 0.021   | 1.66 (1.04-2.63)         | 0.032*  |
| Poor discharge mRS ( $\geq 2$ ) | 2.02 (1.18-3.44)     | 0.010   | 1.38 (0.79-2.40)         | 0.261   |

\*ABI: The minimal value of left ABI or right ABI; baPWV: using the maximal value of left baPWV or right baPWV.

ABI: ankle-brachial index; baPWV; BMI: body mass index; Brachial-ankle pulse wave velocity; CRR: competing risk regression; mRS: modified Rankin Scale.

**Table S2.** Predictors of a doubling in serum creatinine during follow-up by Cox proportional hazards model.

| Variables                       | Crude HR<br>(95% CI) | P Value | Adjusted CRR<br>(95% CI) | P Value |
|---------------------------------|----------------------|---------|--------------------------|---------|
| Age                             | 1.04 (1.01-1.07)     | 0.015   | 1.01 (0.98-1.04)         | 0.370   |
| Male                            | 0.99 (0.51-1.91)     | 0.969   |                          |         |
| BMI                             | 0.94 (0.87-1.03)     | 0.201   |                          |         |
| Borderline ABI<br>(0.91~0.99)   | 2.09 (0.86-5.09)     | 0.106   | 2.04 (0.85-4.89)         | 0.110   |
| Abnormal ABI ( $\leq 0.90$ )    | 4.35 (2.15-8.80)     | <0.001  | 3.15 (1.42-6.96)         | 0.005*  |
| baPWV $\geq 1.4$                | 0.54 (0.19-1.53)     | 0.246   |                          |         |
| Hyperlipidemia                  | 1.08 (0.55-2.11)     | 0.825   |                          |         |
| Heart disease                   | 0.65 (0.20-2.14)     | 0.478   |                          |         |
| Smoking                         | 1.01 (0.33-3.09)     | 0.986   |                          |         |
| Hypertension                    | 1.65 (0.80-3.42)     | 0.179   |                          |         |
| Diabetes Mellitus               | 1.51 (0.79-2.88)     | 0.211   |                          |         |
| Poor discharge mRS ( $\geq 2$ ) | 2.57 (1.12-5.90)     | 0.026   | 1.68 (0.70-4.04)         | 0.250   |

\*ABI: The minimal value of left ABI or right ABI; baPWV: using the maximal value of left baPWV

or right baPWV

ABI: ankle-brachial index; baPWV; BMI: body mass index; Brachial-ankle pulse wave velocity; CRR: competing risk regression; mRS: modified Rankin Scale.

**Table S3.** Predictors of ESRD during follow-up by Cox proportional hazards model.

| Variables                     | Crude HR<br>(95% CI) | P Value | Adjusted CRR<br>(95% CI) | P Value |
|-------------------------------|----------------------|---------|--------------------------|---------|
| Age                           | 1.05 (1.01-1.09)     | 0.023   | 1.03 (0.99-1.07)         | 0.097   |
| Male                          | 1.36 (0.56-3.28)     | 0.497   |                          |         |
| BMI                           | 0.97 (0.88-1.08)     | 0.592   |                          |         |
| Borderline ABI<br>(0.91~0.99) | 1.06 (0.24-4.68)     | 0.936   | 0.86 (0.21-3.58)         | 0.834   |
| Abnormal ABI ( $\leq 0.90$ )  | 4.04 (1.56-10.45)    | 0.004   | 2.48 (1.00-6.17)         | 0.050*  |
| baPWV $\geq 1.4$              | 0.59 (0.14-2.56)     | 0.485   |                          |         |
| Hyperlipidemia                | 1.17 (0.50-2.73)     | 0.723   |                          |         |
| Heart disease                 | 1.03 (0.30-3.52)     | 0.966   |                          |         |
| Smoking                       | 0.99 (0.27-3.70)     | 0.994   |                          |         |
| Hypertension                  | 1.36 (0.56-3.30)     | 0.495   |                          |         |

---

|                                 |                  |       |
|---------------------------------|------------------|-------|
| Diabetes Mellitus               | 1.40 (0.62-3.16) | 0.415 |
| Poor discharge mRS ( $\geq 2$ ) | 1.21 (0.52-2.84) | 0.656 |

---

\*ABI: The minimal value of left ABI or right ABI; baPWV: using the maximal value of left baPWV or right baPWV

Note: Subjects were excluded from the analysis if they had already been diagnosed with ESRD.

ABI: ankle-brachial index; baPWV; BMI: body mass index; Brachial-ankle pulse wave velocity; CRR: competing risk regression; ESRD: End-stage renal disease; mRS: modified Rankin Scale
